# Supplementary material
Source: PubMed Central journal article supplement (PMC7154984)
Supplement: NEJMc2001801_appendix.pdf [file NEJMc2001801_appendix.pdf]

## Supplementary Appendix

This appendix has been provided by the authors to give readers additional information about their work.

Supplement to: Song J-Y, Yun J-G, Noh J-Y, Cheong H-J, Kim W-J. Covid-19 in South Korea — challenges of subclinical manifestations. *N Engl J Med*. DOI: 10.1056/NEJMc2001801

## **Supplementary Appendix**

### **Table of Contents**

|                                                                                                                                                              |   |
|--------------------------------------------------------------------------------------------------------------------------------------------------------------|---|
| Figure S1. Epidemic curve of the SARS-CoV-2 infections according to the date of laboratory-confirmed diagnosis in South Korea as of February 10th, 2020..... | 2 |
| Table S1. Characteristics of SARS-CoV-2 infected patients in South Korea.....                                                                                | 3 |

Figure S1. Epidemic curve of the SARS-CoV-2 infections according to the date of laboratory-confirmed diagnosis in South Korea as of February 10th, 2020

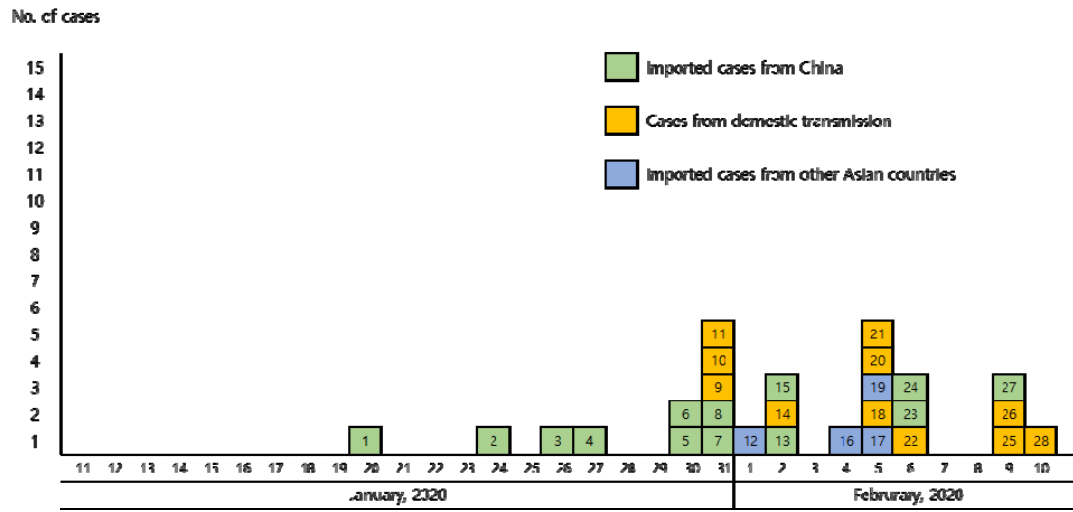

Table S1. Characteristics of SARS-CoV-2 infected patients in South Korea

| No. | Sex/age (years) | Travel history (date of return) | Quarantine measures     | Date of symptom onset | Date of laboratory diagnosis | Symptoms                                           | Transmission                                  |
|-----|-----------------|---------------------------------|-------------------------|-----------------------|------------------------------|----------------------------------------------------|-----------------------------------------------|
| 1   | F/35            | Wuhan (19 Jan 2020)             | Airport quarantine (+)* | 18 Jan 2020           | 20 Jan 2020                  | Fever, chill, myalgia                              | Not detected                                  |
| 2   | M/55            | Wuhan (22 Jan 2020)             | Airport quarantine (+)* | 10 Jan 2020           | 24 Jan 2020                  | Fever, sore throat                                 | Not detected                                  |
| 3   | M/54            | Wuhan (20 Jan 2020)             | Active monitoring       | 22 Jan 2020           | 26 Jan 2020                  | Fever, chill, cough, sputum                        | Likely transmitted to No. 6, 28               |
| 4   | M/55            | Wuhan (20 Jan 2020)             | Active monitoring       | 21 Jan 2020           | 27 Jan 2020                  | Respiratory symptom → fever, myalgia (25 Jan 2020) | Not detected                                  |
| 5   | M/33            | Wuhan (24 Jan 2020)             | Active monitoring       | 28 Jan 2020           | 30 Jan 2020                  | Fever                                              | Likely transmitted to No. 9                   |
| 6   | M/56            | None                            | Active monitoring       | Not specified         | 30 Jan 2020                  | Symptomatic, but not specified                     | Likely transmitted to No. 10, 11, 21 (family) |
| 7   | M/28            | Wuhan (23 Jan 2020)             | Self-quarantine         | 26 Jan 2020           | 31 Jan 2020                  | Cough → fever, cough, sputum (29 Jan 2020)         | Not detected                                  |
| 8   | F/62            | Wuhan (23 Jan 2020)             | Self-quarantine         | 21 Jan 2020           | 31 Jan 2020                  | Myalgia → fever, cough (27 Jan 2020)               | Not detected                                  |
| 9   | F/28            | None                            | Self-quarantine         | Not reported          | 31 Jan 2020                  | Symptomatic, but not specified                     | Not detected                                  |
| 10  | F/52            | None                            | Self-quarantine         | 29 Jan 2020           | 31 Jan 2020                  | Headache                                           | Not detected                                  |

|    |      |                            |                                                  |               |             |                                                                  |                                                 |
|----|------|----------------------------|--------------------------------------------------|---------------|-------------|------------------------------------------------------------------|-------------------------------------------------|
| 11 | M/25 | None                       | Self-quarantine                                  | 30 Jan 2020   | 31 Jan 2020 | Myalgia                                                          | Not detected                                    |
| 12 | M/49 | Japan<br>(19 Jan 2020)     | No quarantine<br>measure                         | 20 Jan 2020   | 1 Feb 2020  | Fever, myalgia, sore throat                                      | Likely transmitted<br>to No. 14 (family)        |
| 13 | M/28 | Wuhan<br>(31 Jan 2020)     | Mandatory<br>facility<br>quarantine <sup>†</sup> | -             | 2 Feb 2020  | Wuhan Immigrant surveillance test<br>(asymptomatic at diagnosis) | Not detected                                    |
| 14 | F/40 | None                       | Self-quarantine                                  | 29 Jan 2020   | 2 Feb 2020  | Symptomatic, but not specified                                   | Not detected                                    |
| 15 | M/43 | Wuhan<br>(20 Jan 2020)     | Self-quarantine <sup>§</sup>                     | 1 Feb 2020    | 2 Feb 2020  | Mild respiratory symptoms                                        | Likely transmitted<br>to No. 20 (family)        |
| 16 | F/42 | Thailand<br>(19 Jan 2020)  | No quarantine<br>measure                         | 25 Jan 2020   | 4 Feb 2020  | Fever, chilling                                                  | Likely transmitted<br>to No. 18, 22<br>(family) |
| 17 | M/38 | Singapore<br>(24 Jan 2020) | No quarantine<br>measure <sup>†</sup>            | Not specified | 5 Feb 2020  | Mild respiratory symptoms                                        | Not detected                                    |
| 18 | F/21 | Thailand<br>(19 Jan 2020)  | Self-quarantine                                  | -             | 5 Feb 2020  | Close contact surveillance test<br>(asymptomatic at diagnosis)   | Not detected                                    |
| 19 | M/36 | Singapore<br>(23 Jan 2020) | No quarantine<br>measure <sup>†</sup>            | 31 Jan 2020   | 5 Feb 2020  | Mild respiratory symptoms                                        | Not detected                                    |
| 20 | F/41 | None                       | Self-quarantine                                  | 5 Feb 2020    | 5 Feb 2020  | Sore throat                                                      | Not detected                                    |
| 21 | F/59 | None                       | Self-quarantine                                  | 5 Feb 2020    | 5 Feb 2020  | Not reported                                                     | Not detected                                    |
| 22 | M/46 | None                       | Self-quarantine                                  | -             | 6 Feb 2020  | Close contact surveillance test<br>(asymptomatic at diagnosis)   | Not detected                                    |
| 23 | F/57 | Wuhan                      | Immigration                                      | 3 Feb 2020    | 6 Feb 2020  | Fever                                                            | Under contact                                   |

|    |      |                                   |                                |               |             |                                 |                                           |
|----|------|-----------------------------------|--------------------------------|---------------|-------------|---------------------------------|-------------------------------------------|
|    |      | (23 Jan 2020)                     | survey (from Wuhan)            |               |             |                                 | surveillance                              |
| 24 | M/28 | Wuhan†<br>(31 Jan 2020)           | Mandatory facility quarantine‡ | 6 Feb 2020    | 6 Feb 2020  | Sore throat                     | Not detected                              |
| 25 | F/73 | None                              | No quarantine measure          | 6 Feb 2020    | 9 Feb 2020  | Fever, cough, sore throat       | Under contact surveillance                |
| 26 | M/51 | Guangdong, Macau<br>(31 Jan 2020) | No quarantine measure          | 8 Feb 2020    | 9 Feb 2020  | Sore throat                     | Under contact surveillance                |
| 27 | F/37 | Guangdong, Macau<br>(31 Jan 2020) | No quarantine measure          | 4 Feb 2020    | 9 Feb 2020  | Cough                           | Likely transmitted to No. 25, 26 (family) |
| 28 | F/30 | None                              | Self-quarantine                | Not specified | 10 Feb 2020 | Not evaluable due to medication | Not detected                              |

\* The cases were isolated with suspicion of SARS-CoV-2 infection.

† Patients 17 and 19 participated in the same business meeting in Singapore. A Malaysian among 109 participants was diagnosed to have SARS-CoV-2 infection, so the patients visited SARS-CoV-2 screening clinic after they got the information.

‡ Patients 13 and 24 were evacuated from Wuhan by government.

§ Patient 15 did not keep the rule of self-quarantine.
